# Supplementary material
Source: PubMed Central journal article supplement (PMC5628188)
Supplement: 439_2017_1836_MOESM1_ESM.pdf [file 439_2017_1836_MOESM1_ESM.pdf]

**Supplemental Table 1. Genotype, imputation and association analysis by Stage 1 study**

| Study    | Genotyping Platform                                             | Before Imputation |           |           |               | Imputation | Post-QC SNPs | Analysis Program | Covariates | Lambda |
|----------|-----------------------------------------------------------------|-------------------|-----------|-----------|---------------|------------|--------------|------------------|------------|--------|
|          |                                                                 | Calling Algorithm | N SNPs    | Call Rate | SNP Call Rate |            |              |                  |            |        |
| BioVU    | Affymetrix Axiom BioBank Array & Affymetrix Axiom World Array 3 | Birdsuite         | 1,345,099 | 0.95      | 0.95          | IMPUTE v2  | 16,616,168   | SNPTest          | 5PCs       | 1.005  |
| Mt Sinai | Illumina Omni 1M                                                | GenomeStudio      | 827,762   | 0.95      | 0.95          | IMPUTE v2  | 16,636,703   | SNPTest          | 5PCs       | 1.023  |
| BIOME    | Illumina 1M                                                     | GenomeStudio      | 675,206   | 0.95      | 0.95          | IMPUTE v2  | 16,781,541   | SNPTest          | 5PCs       | 1.016  |
| CARDIA   | Affymetrix 6.0                                                  | Birdsuite         | 855,408   | 0.95      | 0.95          | IMPUTE v2  | 16,701,587   | SNPTest          | 5PCs       | 1.022  |

**Supplemental Table 2. Association results by stage of meta-analysis**

| Chr | Pos       | SNP        | Gene        | EA/RA | EAF  | Stage 1 (N=1,273/1,379) |          |                        | Stage 1 + 2 (N=3,399/4,764) |                 |                        |
|-----|-----------|------------|-------------|-------|------|-------------------------|----------|------------------------|-----------------------------|-----------------|------------------------|
|     |           |            |             |       |      | OR(95%CI)               | P        | Direction <sup>1</sup> | OR(95%CI)                   | P               | Direction <sup>1</sup> |
| 22  | 37728254  | rs739187   | CYTH4-ELFN2 | T/C   | 0.27 | 1.38<br>(1.26 – 1.52)   | 6.46E-07 | ++++                   | 1.23<br>(1.16 – 1.30)       | <b>7.83E-09</b> | ++++++                 |
| 22  | 37722301  | rs4821628  | CYTH4-ELFN2 | A/G   | 0.76 | 0.73<br>(0.60 – 0.86)   | 3.12E-06 | ----                   | 0.81<br>(0.74 – 0.88)       | <b>8.86E-09</b> | -----                  |
| 22  | 37726660  | rs713939   | CYTH4-ELFN2 | T/C   | 0.27 | 1.35<br>(1.22 – 1.50)   | 1.41E-06 | ++++                   | 1.22<br>(1.15 – 1.29)       | <b>1.37E-08</b> | ++++++                 |
| 22  | 37719004  | rs5995416  | CYTH4-ELFN2 | T/C   | 0.29 | 1.35<br>(1.22 – 1.47)   | 2.49E-06 | ++++                   | 1.21<br>(1.14 – 1.28)       | <b>3.44E-08</b> | ++++++                 |
| 22  | 37717946  | rs4821627  | CYTH4-ELFN2 | T/C   | 0.29 | 1.36<br>(1.23 – 1.48)   | 2.06E-06 | ++++                   | 1.21<br>(1.14 – 1.27)       | 5.86E-08        | ++++++                 |
| 3   | 5348595   | rs55768811 |             | A/T   | 0.91 | 0.78<br>(0.57 – 0.99)   | 0.018    | ---?                   | 0.76<br>(0.66 – 0.87)       | 2.62E-07        | ---?--                 |
| 8   | 75119342  | rs6472827  |             | T/C   | 0.07 | 0.73<br>(0.52 – 0.95)   | 0.0050   | ----                   | 0.76<br>(0.65 – 0.86)       | 3.89E-07        | -----                  |
| 3   | 5346825   | rs6804817  |             | T/G   | 0.09 | 1.31<br>(1.11 – 1.51)   | 0.0076   | ++++                   | 1.31<br>(1.20 – 1.41)       | 4.18E-07        | ++++++                 |
| 3   | 5348095   | rs62255982 |             | T/C   | 0.09 | 1.27<br>(1.06 – 1.48)   | 0.024    | +++?                   | 1.31<br>(1.21 – 1.42)       | 4.39E-07        | +++?++                 |
| 22  | 37736406  | rs34377599 | CYTH4-ELFN2 | G/GC  | 0.70 | 0.73<br>(0.60 – 0.86)   | 1.53E-06 | ----                   | 0.78<br>(0.69 – 0.88)       | 4.62E-07        | ----?-                 |
| 8   | 4441780   | rs11987640 |             | C/G   | 0.20 | 1.03<br>(0.82 – 1.23)   | 0.81     | ?-++                   | 0.81<br>(0.73 – 0.89)       | 4.85E-07        | ?-+--+                 |
| 8   | 4441757   | rs11987636 |             | A/G   | 0.20 | 1.03<br>(0.82 – 1.23)   | 0.81     | ?-++                   | 0.81<br>(0.73 – 0.89)       | 4.94E-07        | ?-+--+                 |
| 9   | 137312947 | rs36048743 |             | C/G   | 0.77 | 1.41<br>(1.28 – 1.55)   | 3.96E-07 | +++                    | 1.20<br>(1.09 – 1.31)       | 8.42E-04        | +++?-                  |
| 22  | 44357940  | rs9626066  |             | A/T   | 0.02 | 3.41<br>(2.94 – 3.89)   | 4.78E-07 | +++?                   | 1.25<br>(1.03 – 1.47)       | 0.050           | +++?--                 |
| 2   | 7474207   | rs12621056 |             | A/G   | 0.93 | 0.55<br>(0.32 – 0.78)   | 4.55E-07 | ----                   | 0.96<br>(0.85 – 1.06)       | 0.42            | ----++                 |

<sup>1</sup>Order of studies: BioVU, BioME, CARDIA, Mt Sinai, 23andMe, BWHS  
Full summary statistics are available upon request.

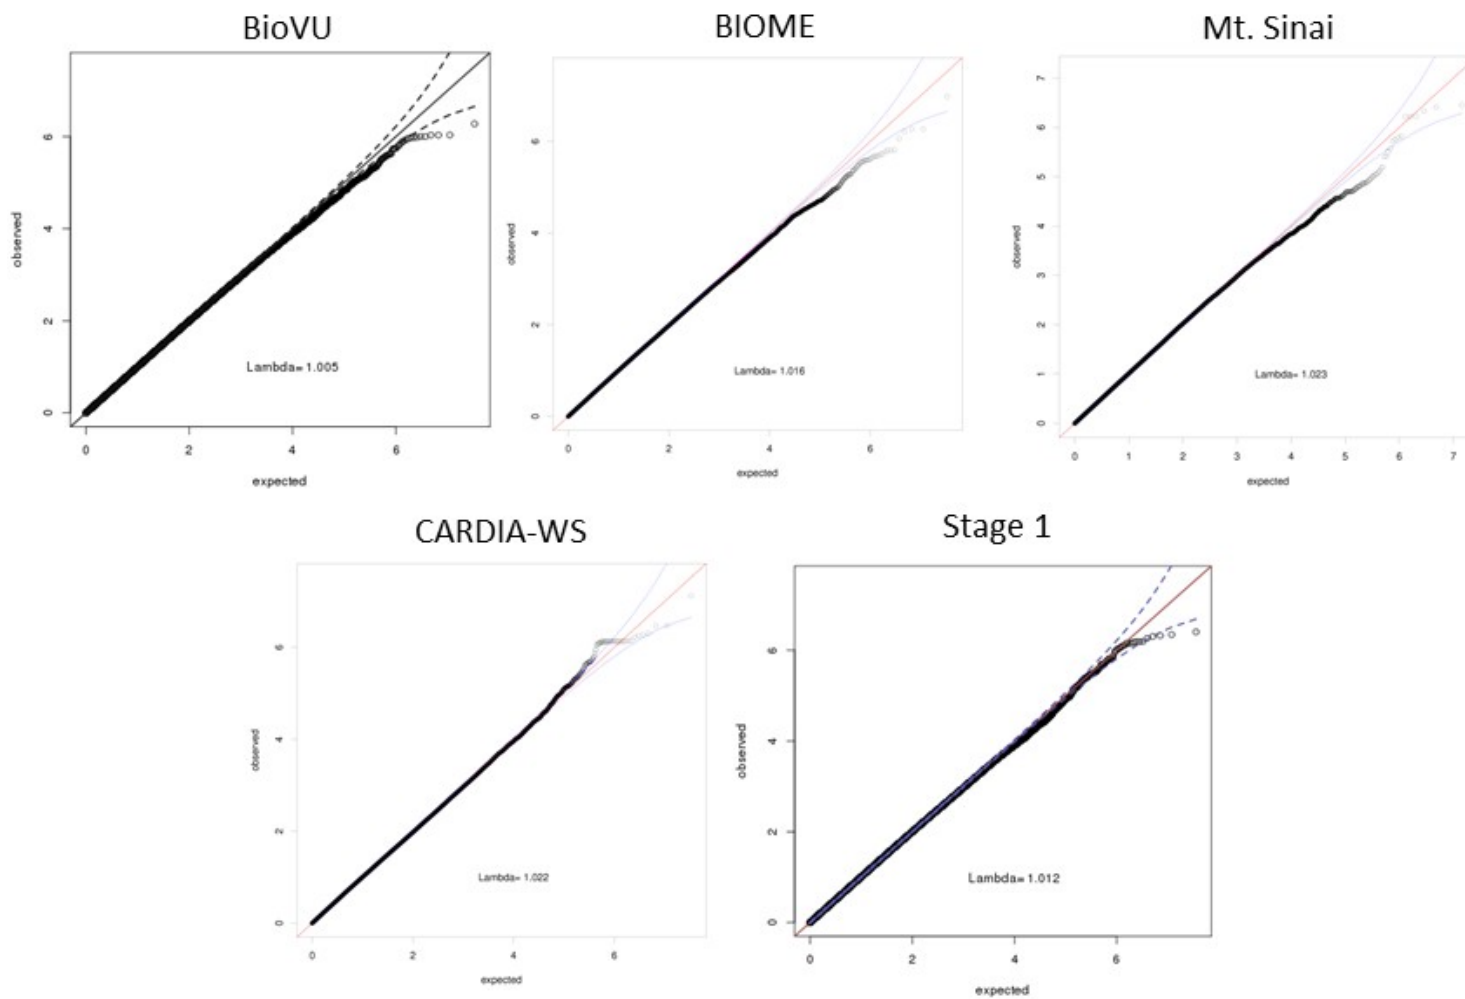

**Supplemental Figure 1. African American quantile-quantile plot by cohort and for meta-analysis**

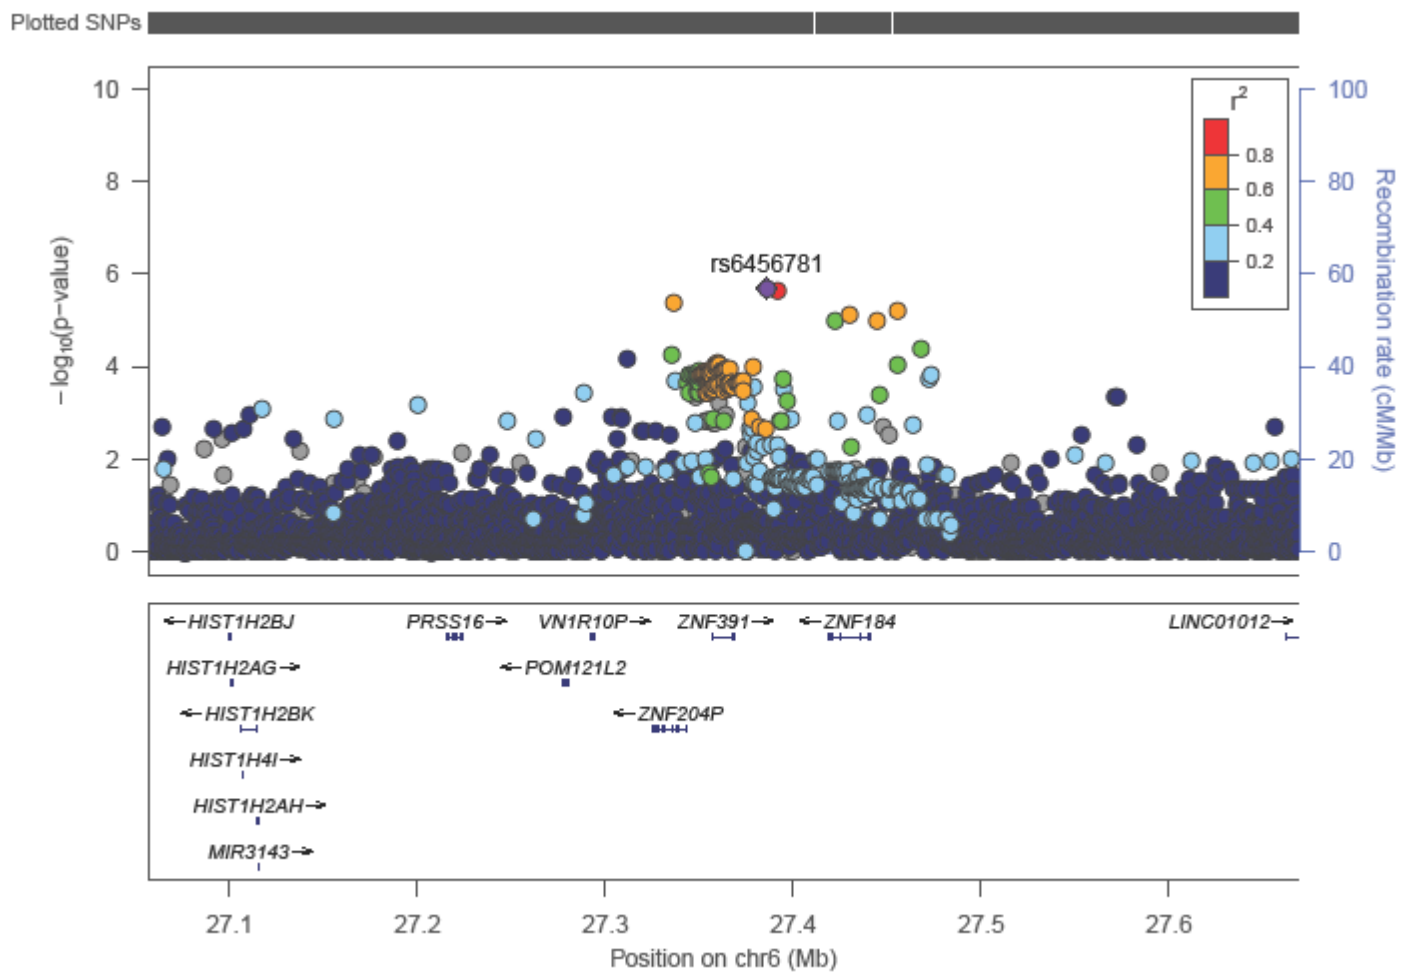

Supplementary Figure 2. LocusZoom plot displaying suggestive association near ZNF391.

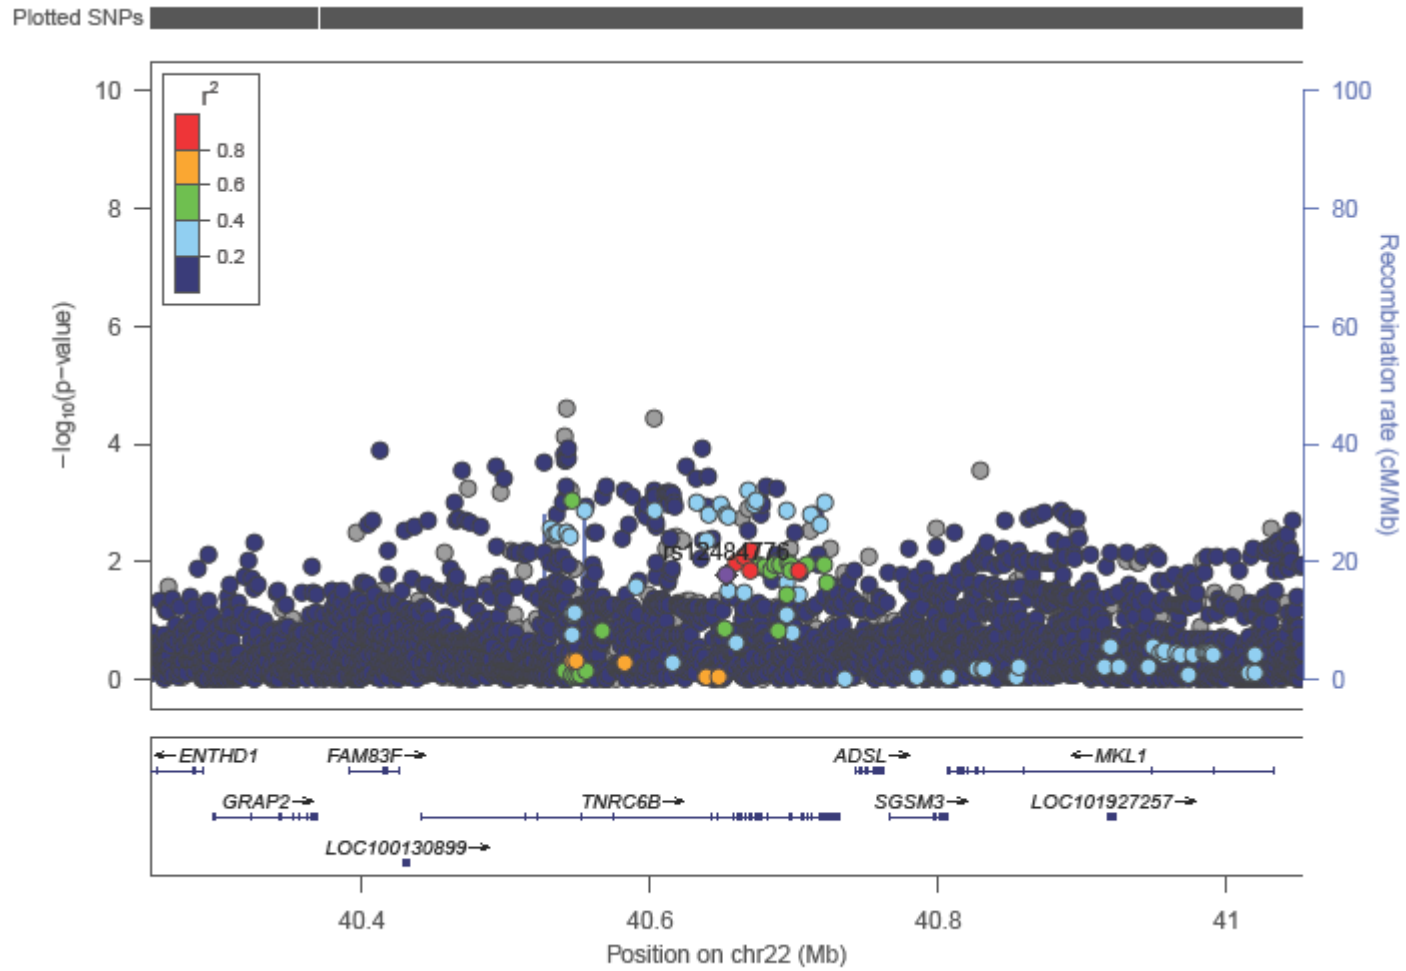

**Supplementary Figure 3. LocusZoom plot displaying previously identified region *TNRC6B* (rs12484776)**

Plotted SNPs

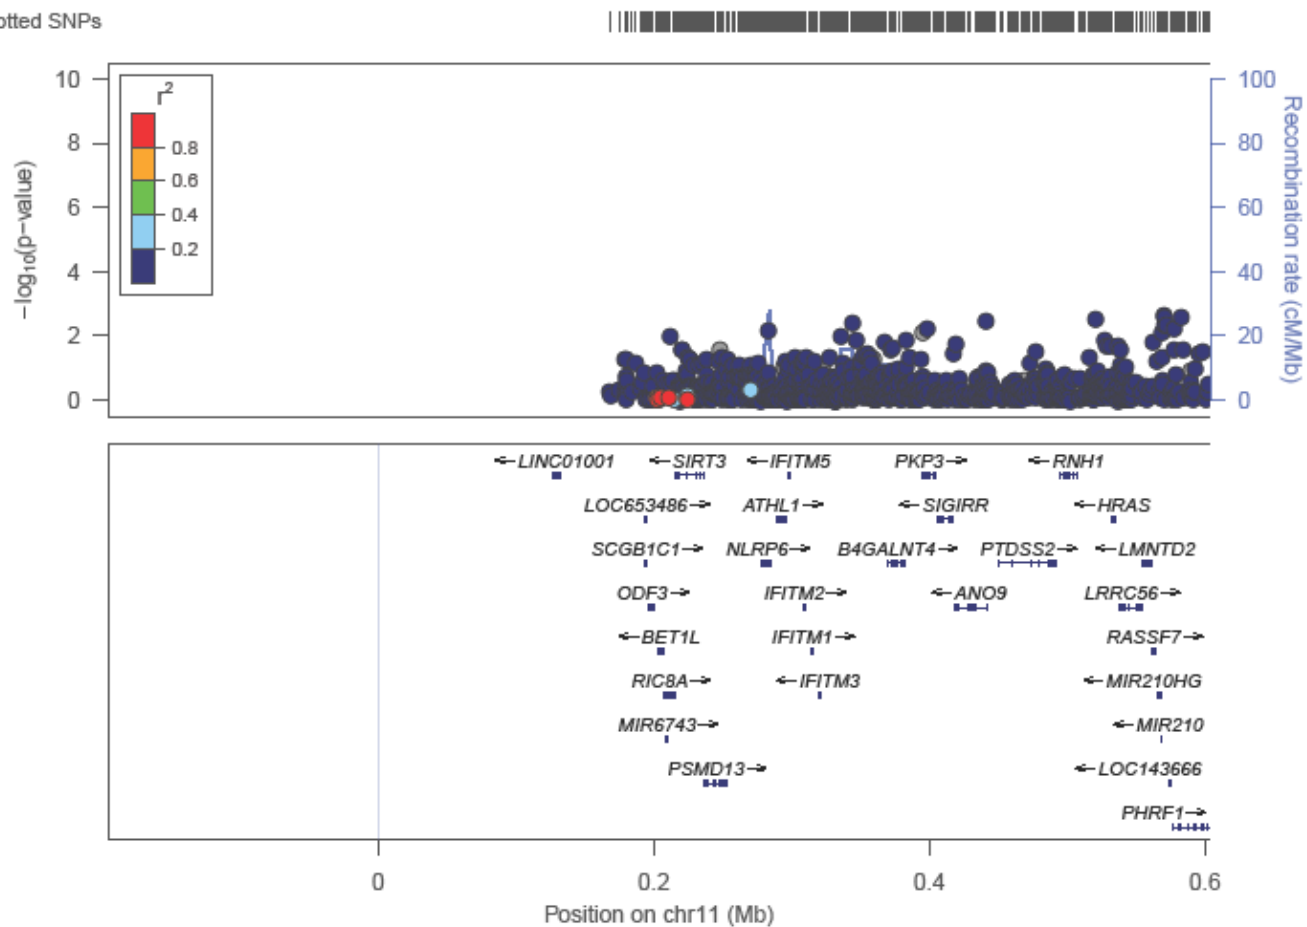

Supplementary Figure 4. LocusZoom plot displaying **BET1L (rs2280543)**:

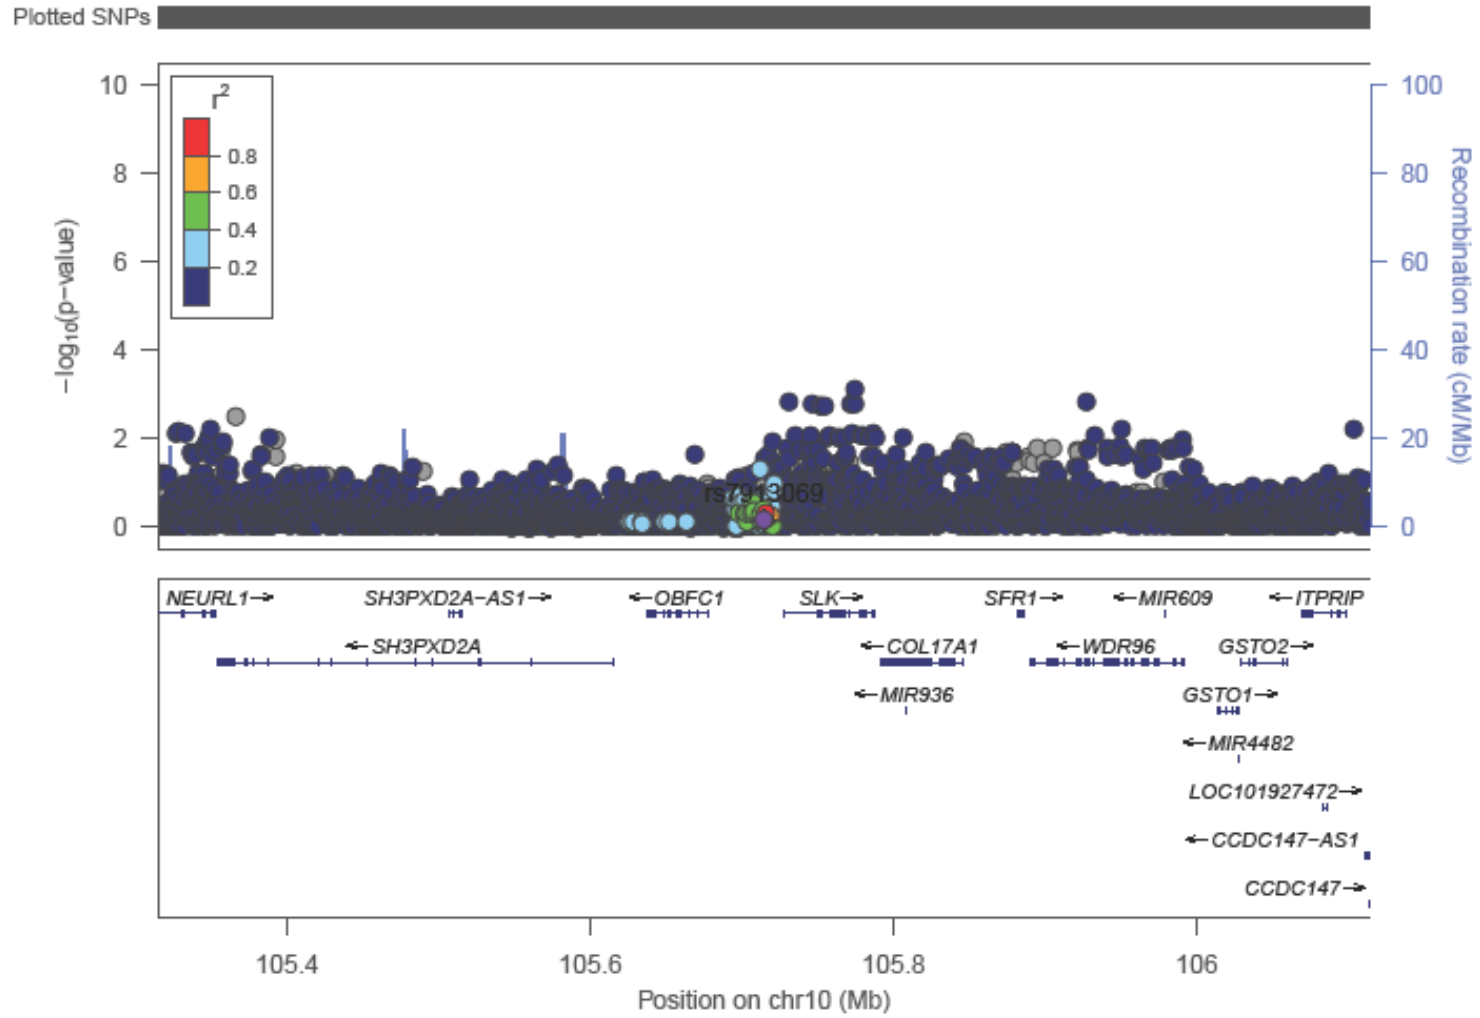

Supplementary Figure 5. LocusZoom plot displaying OBFC1 – SLK (rs7913069):

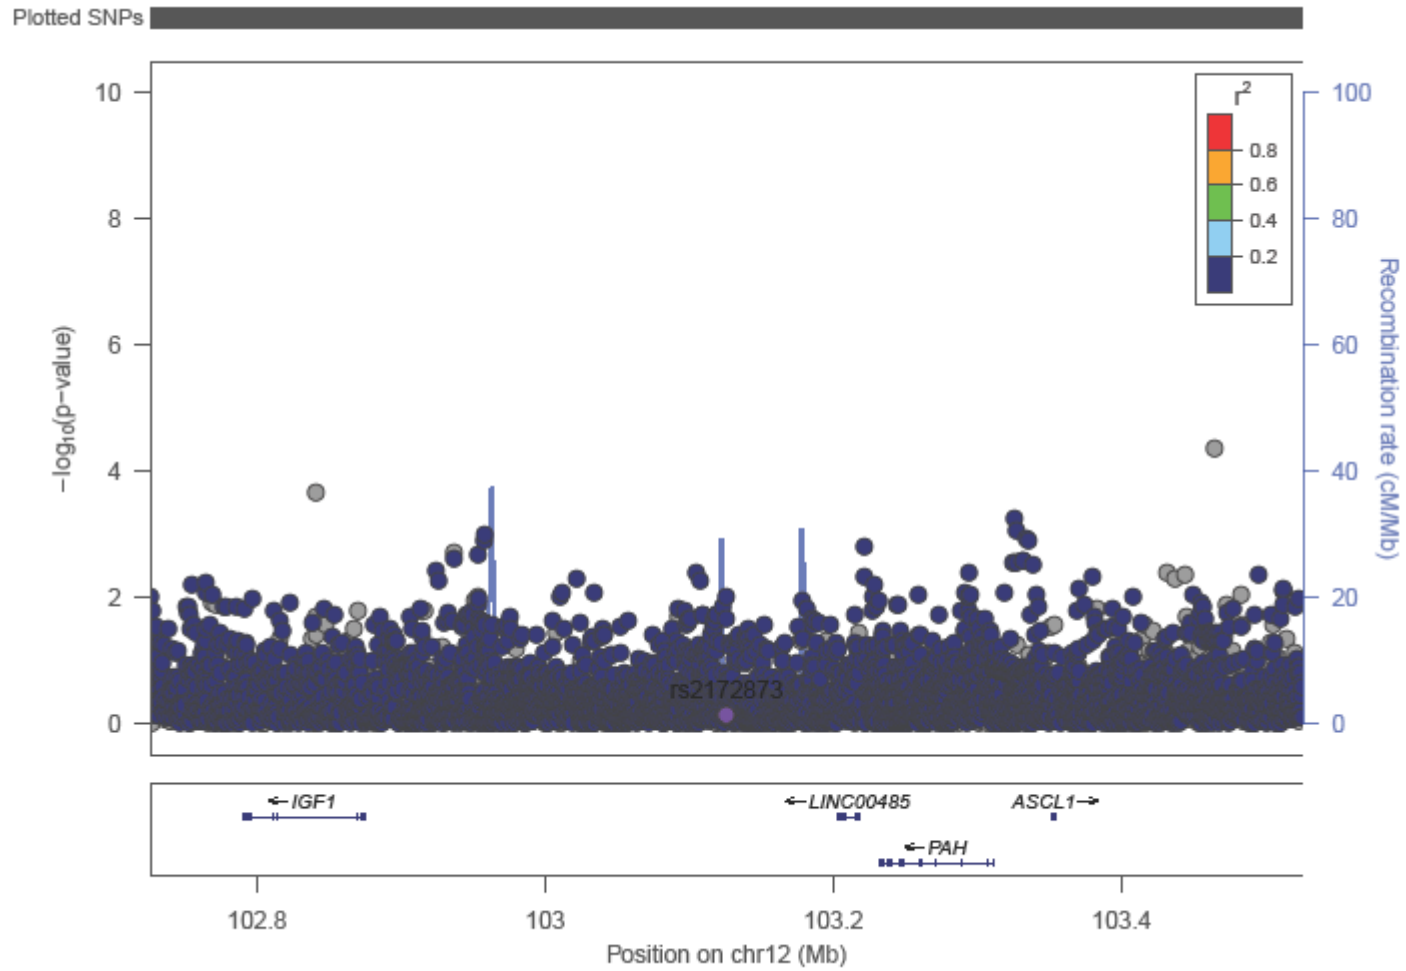

Supplementary Figure 6. LocusZoom plot displaying **Rs2172873**:



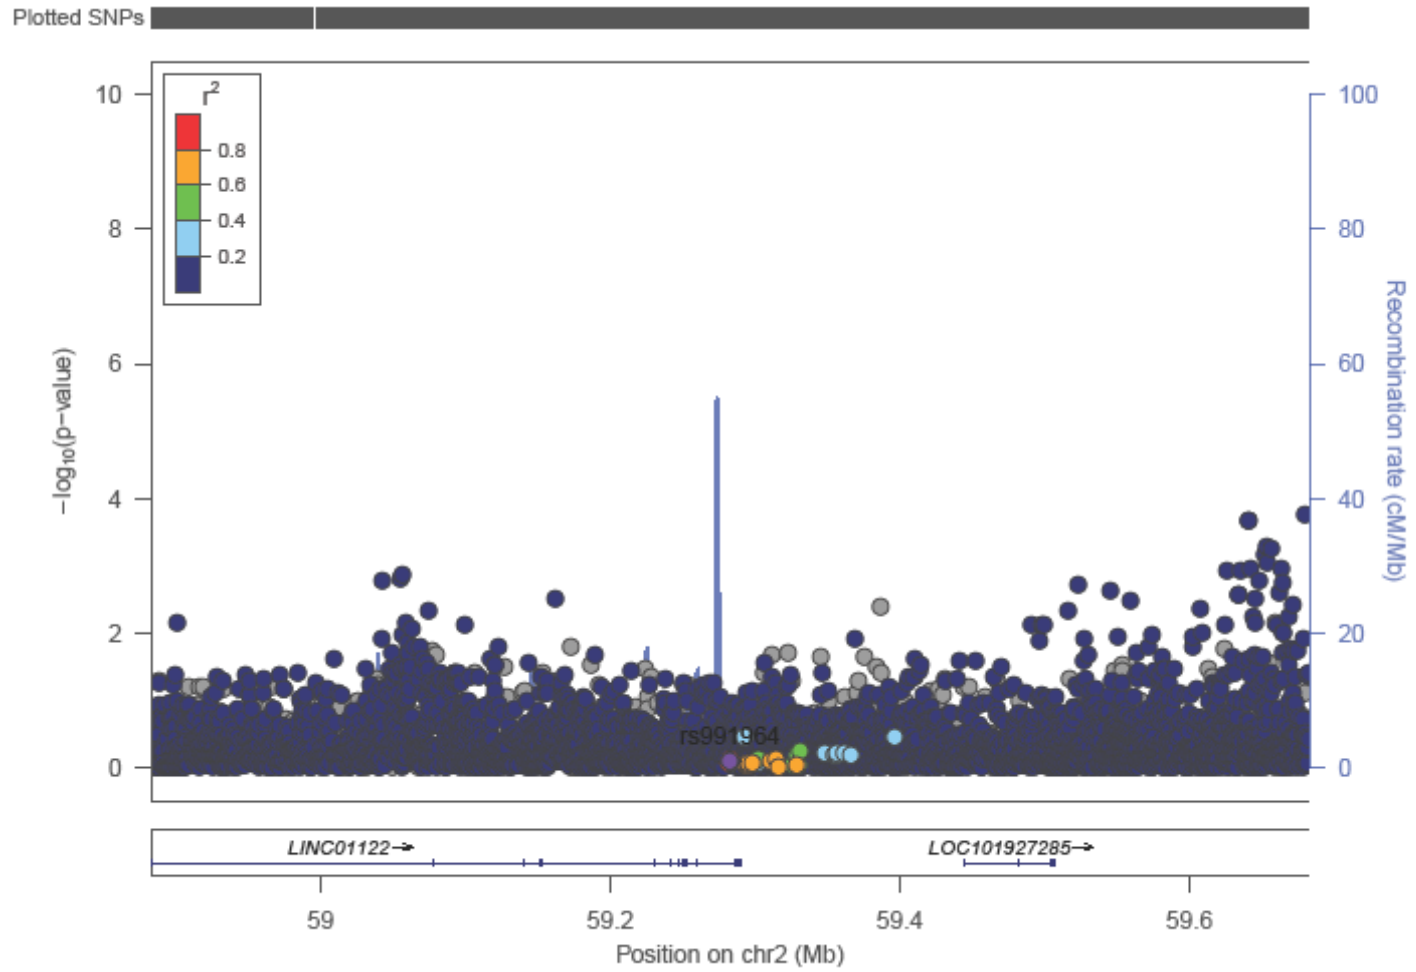

Supplementary Figure 7. LocusZoom plot displaying **Rs991964**:
